# Supplementary material for: Wintertime Aerosol Measurements during the Chilean Coastal Orographic Precipitation Experiment
Source: Copernicus journal article supplement (doi:10.5194/acp-2019-185), 2019-05-08
Supplement: Supplementary file [file acp-2019-185-AC1-supplement.pdf]

1 Reviewer-1

2 We appreciate your review and critique of the manuscript. Thank you.

3 Please note: Line numbers stated here are from the original manuscript.

4 The paper presents results from a measurement campaign (CCOPE) on the Chilean Pacific Coast. The  
5 data consist of particle number concentrations measured with a condensation particle counter (CPC)  
6 and size distributions measured with a high-resolution optical particle counter (UHSAS) at a  
7 measurement station near the town of Arauco. The data are used for parameterizations of aerosol  
8 properties relevant to cloud and precipitation processes: number-to-volume ratios, concentrations of  
9 cloud condensation nuclei and sea-salt aerosol. The goal is to use these parameterizations for  
10 interpreting other data collected during the campaign on the Nahuelbuta Mountains about 30 – 100  
11 km south of Arauco. The paper is basically well written and I can recommend its publication in ACP  
12 after some corrections and more detailed explanations.

13 It is in a way pleasant to see that it is still possible to make relevant observations even with such very  
14 simple traditional aerosol instrumentation when the setup in most similar campaigns today consists of  
15 several instruments measuring both physical properties and chemical composition. On the other hand,  
16 the lack of knowledge of size distributions at sizes smaller than those measured with the UHSAS,  
17 chemical composition and hygroscopicity increase the uncertainty of the interpretations. Discuss this.

18 We feel that the last four paragraphs of Section 4.4 address this. Please see Section 4.4 of the  
19 revised manuscript. Finally, since estimates of the effective supersaturation (Hudson 1984) are  
20 generally smaller than 0.2%, at least in liquid-only stratocumulus (Snider et al. 2017), we do not think  
21 that lack of knowledge at  $D < 0.06 \mu\text{m}$  is a limiting factor.

22 Hudson, J. G., 1984: Cloud condensation nuclei measurements within clouds. *J. Climate Appl.*  
23 *Meteor.*, 23, 42–51, doi:10.1175/1520-0450(1984)023,0042:CCNMWC.2.0.CO;2.

24 Snider, J.R., D.Leon and Z.Wang, Droplet Concentration and Spectral Broadening in Southeast  
25 Pacific Stratocumulus, *J. Atmos. Sci.*, 74, 719-749, 2017

26

27 The trajectories were calculated with HYSPLIT by using the GDAS wind data with a 0.5° spatial  
28 resolution. This is so coarse that the effects of local topography are not properly taken into account.  
29 The measurement site is very close to the town of Arauco and the sea, Gulf of Arauco is to the north of  
30 it and to the west of Arauco there are some hills higher than 300 m. As a result, even when the HYSPLIT  
31 trajectories show that wind blows from the west local wind in Arauco may have blown from other  
32 directions bringing anthropogenic aerosol from the town. The main goal of the paper is to use the  
33 parameterizations in the CCOPE data interpretations and modeling. During westerly winds the  
34 Nahuelbuta Mountains are definitely not affected by the anthropogenic sources around the Gulf of  
35 Arauco whereas your measurement station obviously is – the average total particle number  
36 concentration in air that you classified as "clean" was  $2759 \pm 1827 \text{ cm}^{-3}$ . This is high compared with  
37 marine aerosol essentially everywhere, possibly also on the coast directly to the west of the  
38 Nahuelbuta Mountains. In light of this, discuss the validity of the results for CCOPE.

39 Yes, spatial resolution of the GDAS is a factor limiting our ability to stratify measurements made  
40 at the Arauco Site. In spite of the limitation, our conditional sampling does demonstrate that aerosol  
41 surface area at the Arauco site is, on average, smaller than that reported by Hegg and Kaufman (1998)  
42 over the western Atlantic in air that had advected from the United States. The comparison of aerosol  
43 surface area is discussed in Sect. 5 of the manuscript. Related to your point about representativeness,  
44 the Arauco CPC data can be used to generate lower and upper quartile values of  $N_{\text{CPC}}$  ensemble. The  
45 quartiles are  $789$  and  $2151 \text{ cm}^{-3}$ , respectively. We did not present these  $N_{\text{CPC}}$  quartiles in the  
46 manuscript, but they are easily derived using the  $N_{\text{CPC}}$  ensemble described in the Supplementary  
47 Material (manuscript) or using the data reader we provided (see section titled "Data Availability"). The  
48 lower quartile  $N_{\text{CPC}}$  ( $789 \text{ cm}^{-3}$ ) indicates that 25% of the time conditions were comparable to the  
49 wintertime average at THD (Section 4.1).

50 You also assert that "...directly west of Nahuelbuta Mountains.." a more pristine aerosol state  
51 may exist. We are not convinced this is true. In Fig. 1 (revised manuscript), Lebu (population 24,000)  
52 and Cañete (population 32,000) are included. Another small city (Curanilahue) was in Figure 1 of the  
53 original manuscript. These small cities increase the possibility that cloud and precipitation over the  
54 Nahuelbuta are impacted by anthropogenic aerosols, even in a westerly flowing air. Furthermore,  
55 source/receptor relationships for aerosols on the Central Chilean Coast depend on source strength and

56 a host of meteorological factors (e.g., extratropical cyclone track, thermal stability, and etc.).  
57 Onshore/offshore flow that occurs during meteorologically quiescent periods (sea/land breeze  
58 circulations), could also be significant. For example, if the sea/land circulation creates a “strip” of  
59 aerosol contamination within the near-shore zone, and this air is brought onshore during episodes of  
60 persistent westerly airflow. A “coastal strip” of larger cloud droplet concentration is evident in analyses  
61 of satellite retrievals in Wood et al. (2012; their figure 4). The latter compliments the retrievals of  
62 Bennartz (2007), who we cite in the manuscript (Sect. 5). However, neither Wood et al. (2012) nor  
63 Bennartz (2007) segregate the satellite data into wintertime and summertime ensembles. As we state  
64 in the manuscript (Sect. 5), further analysis of the satellite retrievals are needed to investigate if the  
65 coastal strip exists both in winter and in summer.

66 The previous paragraph focused on aerosol-cloud interactions occurring within the planetary  
67 boundary layer; an additional dimension of the problem is aerosol resident above the planetary  
68 boundary layer. We acknowledge this in Sect. 5 (original and revised manuscript).

69 In summary, we feel that the caveats provided in the manuscript (Sections 5 and 6) are  
70 sufficient for numerical modelling of wintertime Chilean Coastal clouds and precipitation. We are  
71 confident that such modelling will extend understanding beyond the analyses provided here and in  
72 Massmann et al. (2017).

73 Hegg, D. A., and Y. J. Kaufman, Measurements of the relationship between submicron aerosol  
74 number and volume concentration, *J. Geophys. Res.*, 103, 5671-5678, 1998

75 Massmann, A.K., J.R. Minder, R.D. Garreaud, D.E. Kingsmill, R.A. Valenzuela, A. Montecinos, S.L.  
76 Fults, and J.R. Snider, 2017, The Chilean Coastal Orographic Precipitation Experiment: Observing the  
77 Influence of Microphysical Rain Regimes on Coastal Orographic Precipitation. *J. Hydrometeor.*, 18,  
78 2723–2743, <https://doi.org/10.1175/JHM-D-17-0005.1>, 2017

79 Bennartz, R., Global assessment of marine boundary layer cloud droplet number concentration  
80 from satellite, *J. Geophys. Res.*, 112, D02201, 2007

81 Wood, R. ( 2006), Rate of loss of cloud droplets by coalescence in warm clouds, *J.*  
82 *Geophys. Res.*, 111, D21205, doi:10.1029/2006JD007553.

84 **Detailed comments**

85 Section 2.1. Add information on the distance of the Arauco measurement site from the sea, from the  
86 town of Arauco, the paper mill, the Curanilahue measurement station and the rest of the CCOPE  
87 campaign area.

88 A distance scale is provided in Fig. 1 (revised manuscript). Also, a city Coronel (population  
89 110,000), and two small cities Lebu (population 24,000) and Cañete (population 32,000) are included in  
90 the revised Fig. 1.

91 L145-146 " ... CPC concentrations were recorded once per second and once every 10 seconds (Table 1)."

92 The expression "CPC concentrations" would mean there are many Condensation Particle Counters  
93 flying in the air. That is not quite correct. Use "... CPC data were recorded..."

94 **Corrected**

95 Another thing I don't understand, is the logic of saving data once per s and once per 10 s. The 1-s data  
96 has it all, from it 10-s data can be picked up if needed. What is the logic?

97 **The text was revised:**

98 "The CPC counts particles larger than  $D = 0.010 \mu\text{m}$  (Table 1) up to a maximum concentration of 10,000  
99  $\text{cm}^{-3}$ . The UHSAS measures scattering produced when aerosol particles are drawn through light  
100 emitted by a solid state laser ( $\lambda = 1.05 \mu\text{m}$ ). By reference to a calibration table (Cai et al. 2008; Cai et al.  
101 2013), the UHSAS microprocessor converts scattered light intensity to particle size and accumulates  
102 the derived sizes in a 99 channel histogram. Channel widths are logarithmically uniform ( $\Delta\log_{10}D =$   
103 0.013) over the instrument's full range ( $0.055 < D < 1.0 \mu\text{m}$ ). UHSAS data were recorded every 10  
104 seconds and CPC data were recorded once per second (Table 1)."

105 The expressions "**CPC concentration**" and "**UHSAS concentration**" have been used in some sentences  
106 also later. As I wrote above, these should be rewritten. For example title of section 4.1 should rather  
107 be "Comparison of particle number concentrations..."

108 **Corrected.**

109 L256-258 " ... 194 classify as clean sector. For both sites we required a clean sector wind speed  $> 1.5 \text{ m}$   
110  $\text{s}^{-1}$  in addition to the clean sector directional criteria (Fig. 2)."

111 You started wind measurements at Arauco on 19 June. Did you use only the aerosol data after that in  
112 this comparison?

113 **Yes.**

114 L286-289 " *During this two-hour data segment, centered on 00 UTC June 9 (9 pm local time), winds were light at*  
115 *Arauco and Curanilahue ( $< 2 \text{ m s}^{-1}$ ) and the wind direction was variable at Curanilahue (Arauco Site wind direction*  
116 *measurements are only available after 19 June 2015; Sect. 2.1)."*

117 You wrote that wind measurements at Arauco started on 19 June. How can you then write that the  
118 wind at Arauco was  $< 2 \text{ m/s}$  on 9 June?

119 **Meteorological measurements (minus wind direction) were acquired from 29 May to 14 August**  
120 **and meteorological measurements (including wind direction) were acquired 19 June to 14 August. This**  
121 **is stated in Section 2.1 (original and revised manuscript).**

122

123 The distance between Arauco and Curanilahue is approximately 25 km, the measurement site of  
124 Curanilahue is at > 100 m ASL and there are quite a few valleys and hills higher than 100 m ASL between  
125 the two sites. So the local winds at these sites may have been completely different. How justifiable is it  
126 to use Curanilahue in interpreting Arauco data?

127 **Reviewer #1 also commented on this, and we responded. Wind speeds were light at both**  
128 **locations and direction was variable at Curanilahue. A graph of the data is provided below. In general,**  
129 **the effect of wind on aerosol is very difficult to interpret.**

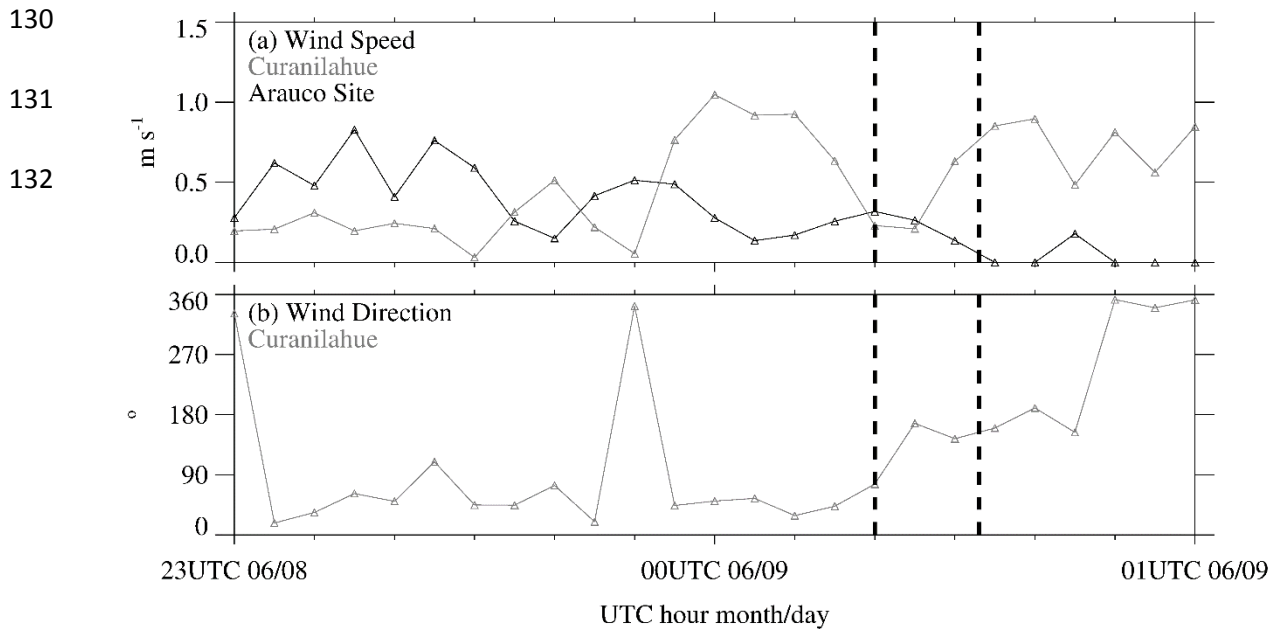

133 Section 4.3

134 In calculating the  $N/V$  ratio, justify using  $N_{UHSAS}$  and not  $N_{CPC}$  for  $N$ ?

135 We rewrote this section of the manuscript. We feel the revision justifies what you commented  
136 on:

137 “In this section we analyze two ASD moments (Section 3.3). These are symbolized  $N_{UHSAS}$  and  $V_{UHSAS}$ ,  
138 respectively. The ratio of  $N_{UHSAS}$  (aerosol concentration) and  $V_{UHSAS}$  (aerosol volume) – generically the  
139  $N/V$  ratio - is of interest for several reasons. First, for both operational and theoretical reasons the  $N/V$   
140 ratio is evaluated for particle diameters larger than  $\sim 0.1 \mu\text{m}$  (VD00; Hegg and Kaufman 1998, hereafter  
141 HK98), and importantly, the model developed to evaluate aerosol exchange between an overlying free  
142 troposphere (FT) and the marine boundary layer (MBL) successfully predicts the  $N/V$  ratio in the MBL  
143 (VD00). Second, a value of the ratio can be derived by fitting measurements of  $N$  and  $V$  (HK98). Third,  
144 aerosol mass loading, and thus an aerosol volume corresponding to an assumed particle density<sup>1</sup>, are  
145 relatively easy to evaluate. A method routinely used to evaluate aerosol mass loading involves pulling  
146 aerosol-laden air through a filter and evaluating the accumulated mass gravimetrically. Fourth, the  
147 product of an  $N/V$  ratio and an ambient aerosol volume (aerosol mass) has been proposed as a scheme  
148 for estimating cloud droplet concentration in marine stratocumulus clouds (HK98 and VD00).  
149 HK98 used a passive cavity aerosol spectrometer probe (PCASP) to evaluate  $N$ ,  $V$  and the  $N/V$  ratio.  
150 Since the UHSAS counts down to a smaller diameter ( $0.055 \mu\text{m}$ ) than the PCASP ( $0.12 \mu\text{m}$ ), it is  
151 expected that the  $N/V$  ratios we derive using the UHSAS will be larger than those in HK98. The main  
152 reason for this is that decreasing the lower-limit diameter increases  $N$  more than  $V$  (VD00).”

153 Hegg, D. A., and Y. J. Kaufman, Measurements of the relationship between submicron aerosol  
154 number and volume concentration, *J. Geophys. Res.*, 103, 5671-5678, 1998

155 van Dingenen, R., A. O. Virkkula, F. Raes, T. S. Bates, A. Wiedensohler, A simple non linear  
156 analytical relationship between aerosol accumulation number and sub-micron volume, explaining their  
157 observed ratio in the clean and polluted marine boundary layer, *Tellus*, 52B, 439-451, 2000

158 \_\_\_\_\_  
<sup>1</sup> In the case of ambient particles containing hygroscopic materials, density values range between  $1.5$  and  $1.8 \text{ g cm}^{-3}$   
(McMurry et al. 2002)

159 What did HK98 and VD00 use?

160 This information is provided in Sect. 4.3. First we present  $N/V$  ratios derived with the lower-  
161 limit diameter set at the minimum particle diameter detected by the UHSAS. Next, we repeat the  
162 analysis with the lower-limit diameter equal to the value applied by HK98. Results are in Tables 3 and  
163 4. The “headline” of these Tables provides the distinction. Additionally, VD00 integrate from minimum  
164 diameter = 0.08  $\mu\text{m}$ , but we do not consider that case.

165



166 Section 4.4

167 L377-385 This is an important part of the paper and it should be understood properly in order to  
168 understand the parameterization FAC(SS) presented later. Now it is not quite clear to me. You have  
169 earlier presented some of the simplest possible aerosol equations, Eqs. (1) – (4), which is fine, they are  
170 good to be shown. But now when it comes to a clearly more complicated issue, equations are missing  
171 which is not logical. And on line 379 it is written " ... **kappa–Köhler formula of Petters and Kreidenweis**  
172 **(2007, their Eq. (11))**" but their Eq. (11) shows the relationship of growth factor, dry particle diameter,  
173 kappa, and relative humidity. How is this used to "...interpret a FAC's lower-limit diameter as an upper-limit  
174 SS" as was stated on line 377? Is the referred equation right? Write the proper equation and explain the steps of  
175 the calculation in more detail so that readers can repeat the calculation for their own data.

176 The relevant equation from Petters and Kreidenweis (2007) was cited incorrectly. This is  
177 changed in the revised manuscript. For calculating critical SS, corresponding to prescribed values of dry  
178 diameter and kappa, we used Eq. 6 (Petters and Kreidenweis 2007). This is corrected in the revised  
179 manuscript. Additionally, our explanation is enhanced by inclusion of Eq. 5 (revision).

180 Here is the revised text:

181 "Our first step is to select a particle diameter, apply this as a lower-limit diameter in an integration of  
182 the UHSAS size distribution, and divide the integral by the coincident CPC-measured concentration.  
183 The resultant is referred to as the *fractional aerosol concentration (FAC)*.

184 
$$FAC(D) = \frac{1}{N_{CPC}} \cdot \int_D^{1\mu m} (dN / d \log_{10} D) \cdot d \log_{10} D \quad (5)$$

185 Figs. 7a - b have graphical representations of  $FAC(D=0.055 \mu m)$  and  $FAC(D=0.120 \mu m)$ .

186 In a second step we interpret a FAC's lower-limit diameter as an upper-limit SS. We do this by applying  
187 a value for the kappa hygroscopicity parameter, which we set at  $\kappa = 0.5$ , and by applying the kappa–  
188 Köhler formula of Petters and Kreidenweis (2007, their Eq. (6)). This transformation from lower-limit  $D$   
189 to upper-limit SS converts the FAC in Fig. 7a to  $FAC(SS = 0.41 \%)$  and the FAC in Fig. 7b to  $FAC(SS = 0.13$   
190  $\%)$ . We also evaluated how a range of the kappa parameter ( $0.3 < \kappa < 0.7$ ) translates to a range of SS.  
191 Our upper-limit  $\kappa$  comes from airborne measurements made over the Southeast Pacific Ocean during

192 summer (Snider et al., 2017), and our lower-limit  $\kappa$  is the value recommended by Andreae and  
193 Rosenfeld (2008) for simulating aerosol indirect effects over continents.”

194

195 Additionally, we rewrote the paragraph explaining how FACs are derived for onshore trajectories. The  
196 revised paragraph is this:

197

198 “The *FACs* in Figs. 7a – b are two of the many available from CCOPE. One way to aggregate these is to  
199 calculate a *FAC* for each of the 20 onshore trajectories. For example, if we select the lower-limit  
200 diameter at  $D = 0.055 \mu\text{m}$ , plot numerator values (Eq. (5)) vs denominator values (Eq. (5)), and fit with  
201 the equation  $Y = a \cdot X$ , the “ $a$ ” we derive is the  $FAC(D = 0.055 \mu\text{m})$  for a particular trajectory. *FACs*  
202 calculated in this way, and with lower-limit  $D$  selected =  $0.120 \mu\text{m}$ , are presented in the seventh  
203 columns of Tables 3 and 4. Correlation coefficients presented in the eighth columns of these tables  
204 mostly exceed 0.5. By averaging over the 20 onshore trajectories, we calculated the overall averages  
205 presented at the bottom of the two tables. These overall averages are  $FAC(D = 0.055 \mu\text{m}) = 0.35 \pm 0.13$   
206 (Table 3) and  $FAC(D = 0.120 \mu\text{m}) = 0.13 \pm 0.07$  (Table 4). This decrease of the *FAC* results because a  
207 larger lower-limit  $D$  (Eq. (5)), implies a smaller numerator (Eq. (5)), and thus a smaller  $FAC(D)$ .”

208

209

210 Section 4.5

211 Refer also to O’Dowd, C. D. and de Leeuw, G. (2007) and consider comparing your results also with the  
212 parameterization they presented

213 O’Dowd, C. D. and de Leeuw, G.: Marine Aerosol Production: a review of the current knowledge, Phil.  
214 Trans. R. Soc. A., 365,1753–1774, doi:10.1098/rsta.2007.2043, 2007

215 O’Dowd and de Leeuw (2007) summarize the sea spray research of Geever et al. (2005) and  
216 Clarke et al. (2006). The latter two references are not compiled in Lewis and Schwartz (2004) (hereafter  
217 LS04). We reference LS04 and Clarke et al. (2006) in the manuscript (original and revised).

218 Clarke et al. (2006) report a particle size-dependent flux function. As discussed in de Leeuw et  
219 al. (2011) (their section 6.5), a *size-dependent flux* can be transformed to a *concentration*,  
220 corresponding to a specified range of particle size, but this requires a steady-state, an assumed value  
221 for atmospheric residence time, and an assumed value for the depth of the MBL. Geever et al. (2005)  
222 investigated sea spray from particles smaller than 1  $\mu\text{m}$ , but did not report a size-dependent flux  
223 function.

224 Using the Clarke et al. (2006) parameterization with a range of wind speeds (3, 6, and 12 m/s),  
225 we transformed to concentrations assuming residence time = 3 day and MBL depth = 500 m (de Leeuw  
226 et al. (2011); their section 6.5). The SSA concentrations we calculated are within a factor = 3 of the  
227 CCOPE curve in Fig. 9. Specifically, the calculated values are smaller at 3 m/s (Fig.9-to-calculated ratio =  
228 1.3) and larger at 12 m/s (Fig.9-to-calculated ratio = 0.33). Given that there is significant variability in  
229 residence time and MBL depth, and in the wind speed scaling applied in Clarke et al. (2006), the result  
230 in Fig. 9 (manuscript) seems reasonable.

231 Summary: Because of assumptions necessary to transform a size-dependent flux to a  
232 concentration, we have not compared our result to sea spray research other than the comparison to  
233 wind-speed-dependent concentrations presented in O’Dowd and Smith (1993).

234 Clarke, A., V. Kapustin, S. Howell, K. Moore, B. Lienert, S. Masonis, T. Anderson, and D. Covert,  
235 Sea-salt size distribution from breaking waves: Implications for marine aerosol production and optical  
236 extinction measurements during SEAS, J. Atmos. Ocean. Technol., 20, 1362–1374, 2003

237            Geever, M., C. D. O'Dowd, S. van Ekeren, R. Flanagan, E. D. Nilsson, G. de Leeuw, and Ü. Rannik,  
238            Submicron sea spray fluxes, *Geophys. Res. Lett.*, 32, L15810, doi:10.1029/2005GL023081, 2005

239            de Leeuw, G., E. L. Andreas, M. D. Anguelova, C. W. Fairall, E. R. Lewis, C. O'Dowd, M. Schulz,  
240            and S. E. Schwartz, Production flux of sea spray aerosol, *Rev. Geophys.*, 49, RG2001,  
241            doi:10.1029/2010RG000349, 2011

242            O'Dowd, C. and G. de Leeuw, Marine aerosol production: a review of the current knowledge,  
243            *Phil. Trans. R. Soc. A.*, 365, 1753–1774, doi:10.1098/rsta.2007.2043, 2007

244            O'Dowd, C.D., and M.H. Smith, Physicochemical properties of aerosols over the Northeast  
245            Atlantic: evidence for wind-speed-related submicron sea-salt aerosol production, *J. Geophys. Res.*, 98,  
246            1137-1149, 1993

247

248 Fig 1. Add a distance scale.

249 Fig. 1 (revised manuscript) has a distance scale. The revised map is shown below. Small cities  
250 Cañete and Lebu, and the city Coronel, are included in the revised Figure 1.

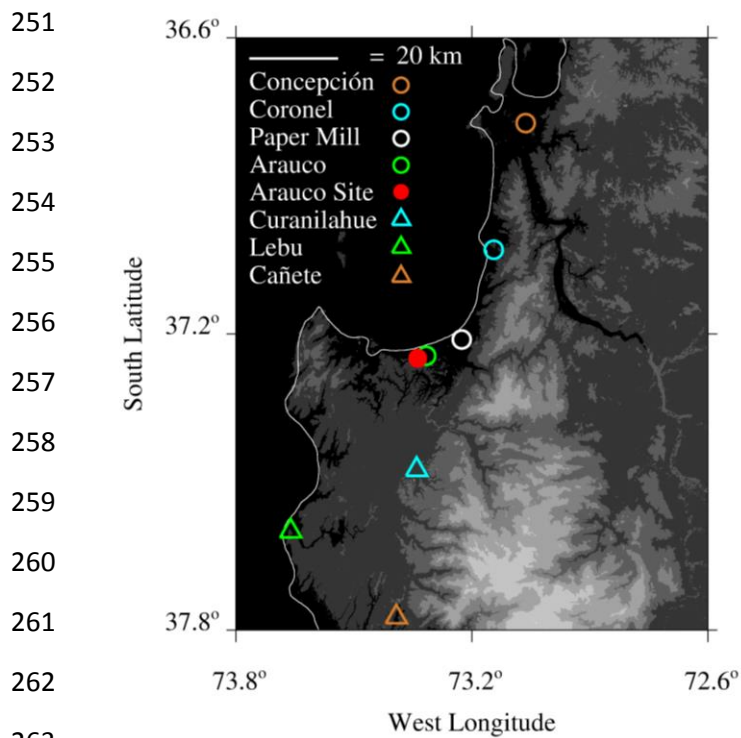

266 Fig. 3b. Why is the y axis reverse? Why is the lowest pressure 920 hPa? A sensible scale would be 990-  
267 1020 hPa.

268 An air parcel's barometric pressure is output by the HYSPLIT model. Fig. 3b (original manuscript)  
269 has this pressure on the Y axis. Pressure, decreasing upward on the Y axis, is a proxy for altitude. In the  
270 revised Fig. 3b (see below), the MSL altitude of the air parcel is plotted. MSL altitude was calculated  
271 using the pressure output by HYSPLIT (parcel barometric pressure) and the ICAO equation for the  
272 Standard Atmosphere (1993). MSL altitude increases if a larger sea-level is pressure applied in the ICAO  
273 equation. This sensitivity is  $\sim 8 \text{ m} / \text{hPa}$ .

274 International Civil Aviation Organization (ICAO), Manual of the ICAO Standard Atmosphere:  
275 extended to 80 kilometres (262500 feet), 3rd ed., ISBN-92-9194-004-6, 1993

276

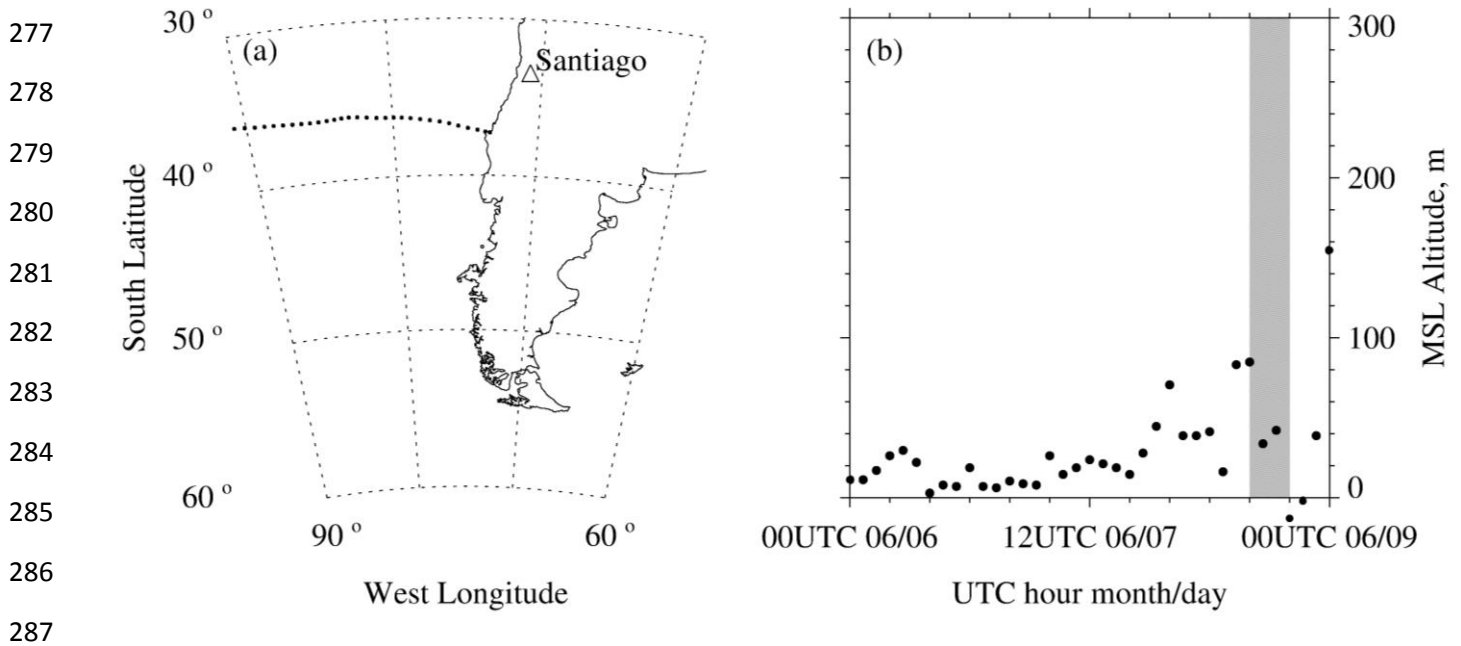

288 Fig. B1. What is the vertical dashed line at ~11:33 UTC?

289 This is explained in the original manuscript (Appendix B). Readers are referred to Appendix B at  
290 L194. The first paragraph of Appendix B (revised manuscript) was revised for clarity. Here is the  
291 revised text:

292 “For each of the onshore trajectories (Sect. 3.1), a two-hour segment, centered on the trajectory arrival  
293 time was analyzed. An example is in Figs. B1a – e. The first panel (Fig. B1a) shows the sequence of  
294 CPC values sampled every second (i.e., 1-s samples referred to as *fast*  $N_{CPC}$ ), and Fig. B1b shows CPC  
295 values sampled every 10 seconds (i.e., 10-s samples referred to as *slow*  $N_{CPC}$ ). The following procedure  
296 was used to attenuate the narrow perturbations that were likely the result of local aerosol emissions (e.g.,  
297 within the time interval indicated by vertical dashed lines in Figs. B1a, B1b, and B1d).”
